# Supplementary material for: Dynamic Co-evolution and Interaction of Avian Leukosis Virus Genetic Variants and Host Immune Responses
Source: PubMed Central journal article supplement (PMC5483431; doi:10.3389/fmicb.2017.01168), 2017-06-26
Supplement: Data_Sheet_1.pdf [file Data_Sheet_1.pdf]

1

## 2 **Dynamic Co-Evolution and Interaction of Avian Leukosis Virus**

### 3 **Genetic Variants and Host Humoral Immunity**

4 Xuan Dong<sup>§,1</sup>, Fanfeng Meng<sup>§,1</sup>, Tao Hu<sup>2</sup>, Sidi Ju<sup>1</sup>, Yang Li<sup>1</sup>, Peng Sun<sup>1</sup>, Yixin Wang<sup>1</sup>,  
5 Wenqing Chen<sup>1</sup>, Fushou Zhang<sup>1</sup>, Hongqin Su<sup>1</sup>, Sifei Li<sup>1</sup>, He Cui<sup>1</sup>, Junxia Chen<sup>1</sup>, Shuzhen  
6 Xu<sup>1</sup>, Lichun Fang<sup>1</sup>, Huaibiao Luan<sup>1</sup>, Zhenjie Zhang<sup>2</sup>, Shuang Chang<sup>1</sup>, Jianliang Li<sup>1</sup>, Lei  
7 Wang<sup>1</sup>, Peng Zhao<sup>1</sup>, Weifeng Shi<sup>\*,2</sup> and Zhizhong Cui<sup>\*,1</sup>

8

9 <sup>1</sup>College of Veterinary Medicine, Shandong Agricultural University, Taian, Shandong, China

10 <sup>2</sup>Institute of Pathogen Biology, Taishan Medical College, Taian, Shandong, China

11 <sup>§</sup>These authors contributed equally to this work.

12 <sup>\*</sup>**Corresponding author:** Zhizhong Cui, zzcui@sdau.edu.cn; Weifeng Shi, shiwf@ioz.ac.cn.

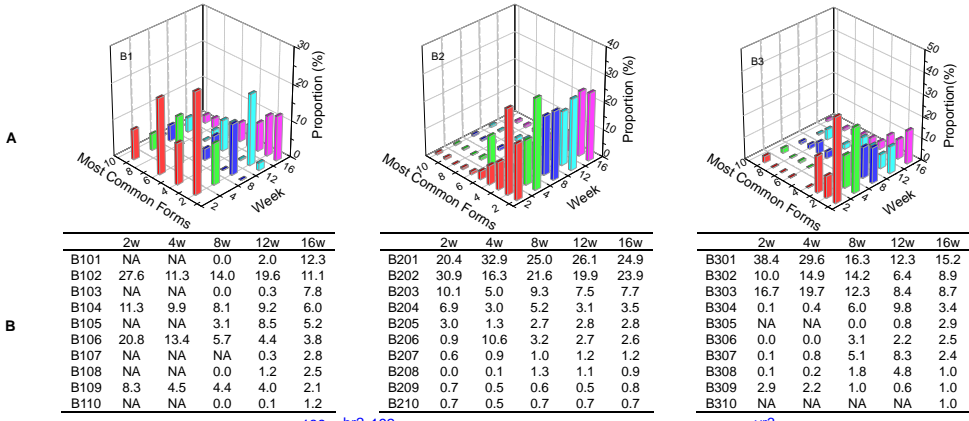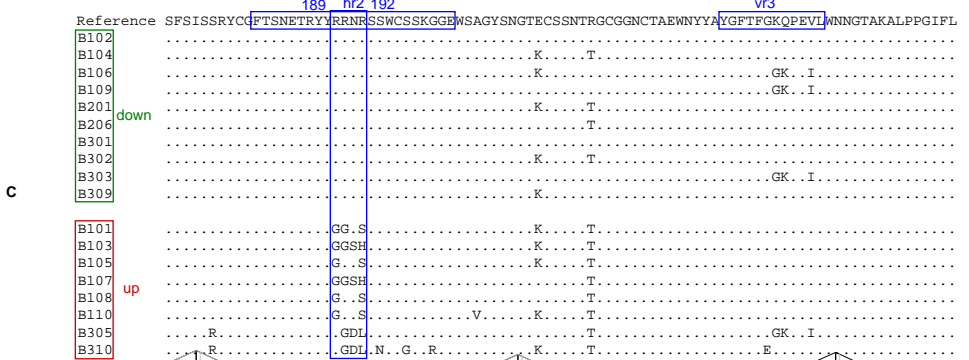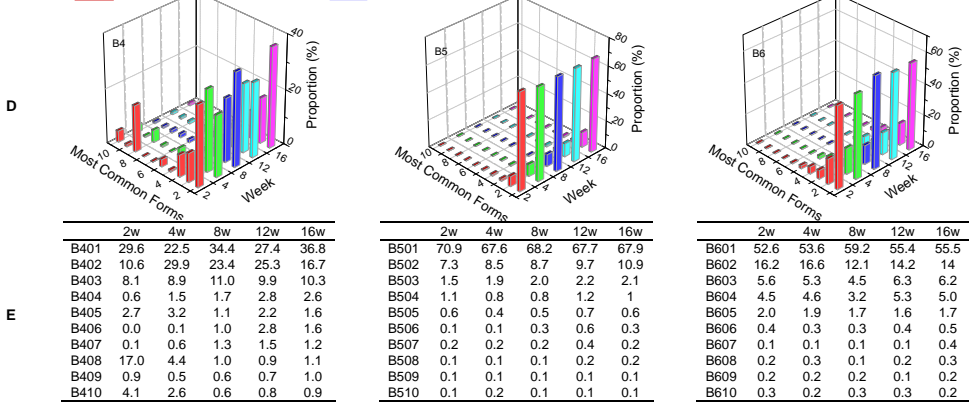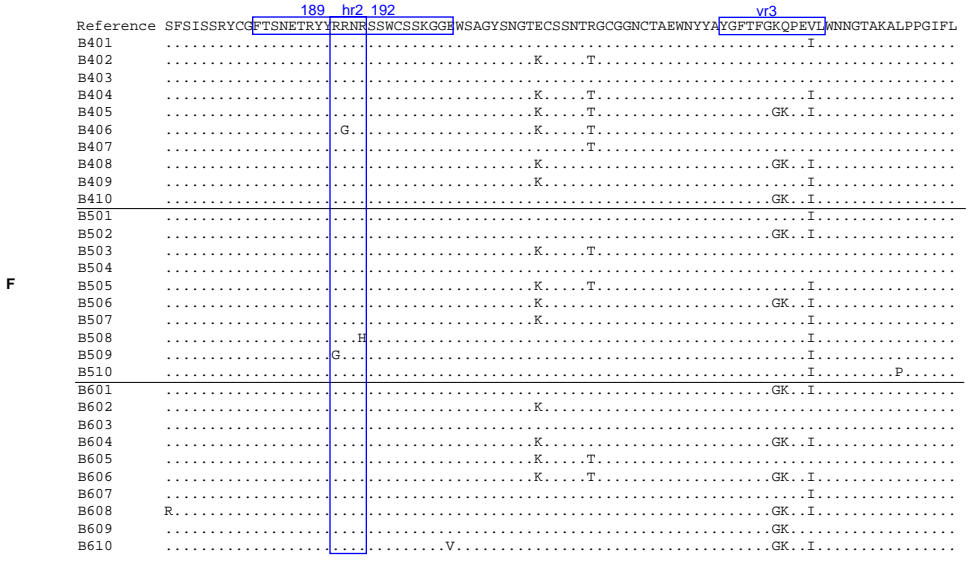

**Fig S1. Evolutionary dynamics of gp85-B (hr2 and vr3 regions) genetic variants in antibody-positive and -negative chickens during the first 16 weeks.**

Chickens 1-3 were antibody-positive, and 4-6 were antibody-negative, as in Figure 1. (A and D) The proportions of the top ten variants of chickens 1-3 and 4-6 at week 16. (B and E) The dynamic proportional changes in top ten variants at week 16 in chickens 1-3 and 4-6, respectively. NA means no available data. (C and F) The amino acid substitutions of the variants of chickens 1-3 and 4-6, respectively. In the two panels, the representative variants were classified into two groups, down and up, in which the proportion of the variants decreases or increases over time, respectively. The most dominant variant when inoculated is used as the reference, and the amino acid positions are numbered from the first codon of the mature gp85 protein. The two previously identified variable regions are highlighted. The variants are ordered according to their rankings at week 16. For example, in B101, “B” refers to region B of the gp85 gene (gp85-B), the first number “1” means chicken 1, and “01” represents the top one variants at week 16; therefore, B101 represents the top one gp85-B variant of chicken 1 at week 16.

**Figure S2**

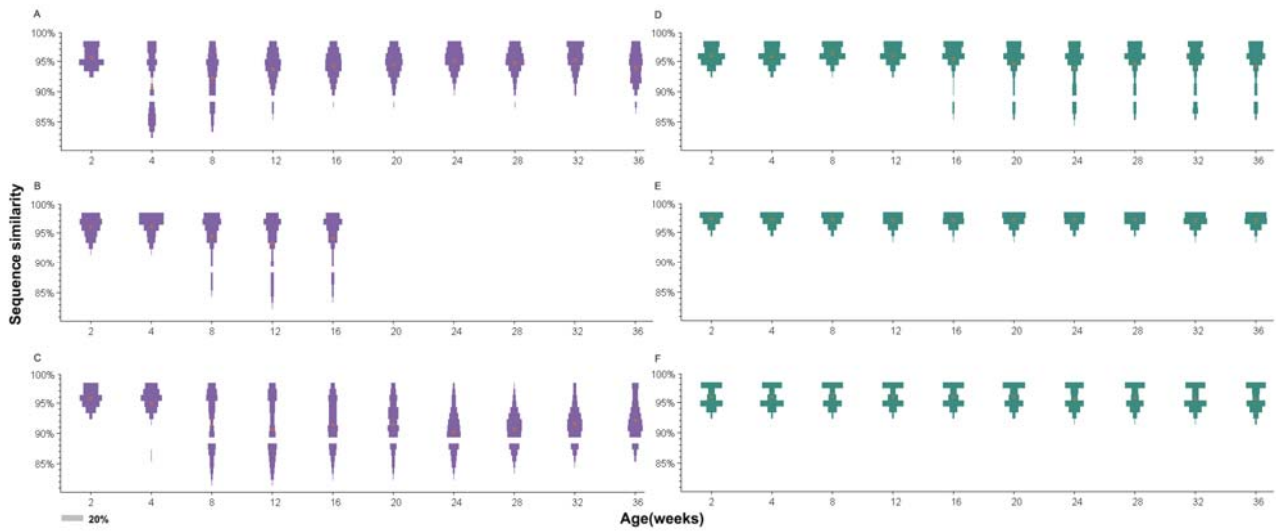

**Fig S2. Distribution of sequence similarity of the gp85-B genetic variants during a 36-week period.**

(A, B and C) The sequence similarity of chickens 1-3, respectively. (D, E and F) The sequence similarity of chickens 4-6, respectively. The x-axis of each panel represents different sampling time-points. The y-axis represents sequence similarity. The red bar represents 100% identity, and the orange circle represents the mean value of sequence similarity. The width of the grey bar represents the proportion of this sequence similarity value, and the legend is given in the lower left corner.

**Figure S3**

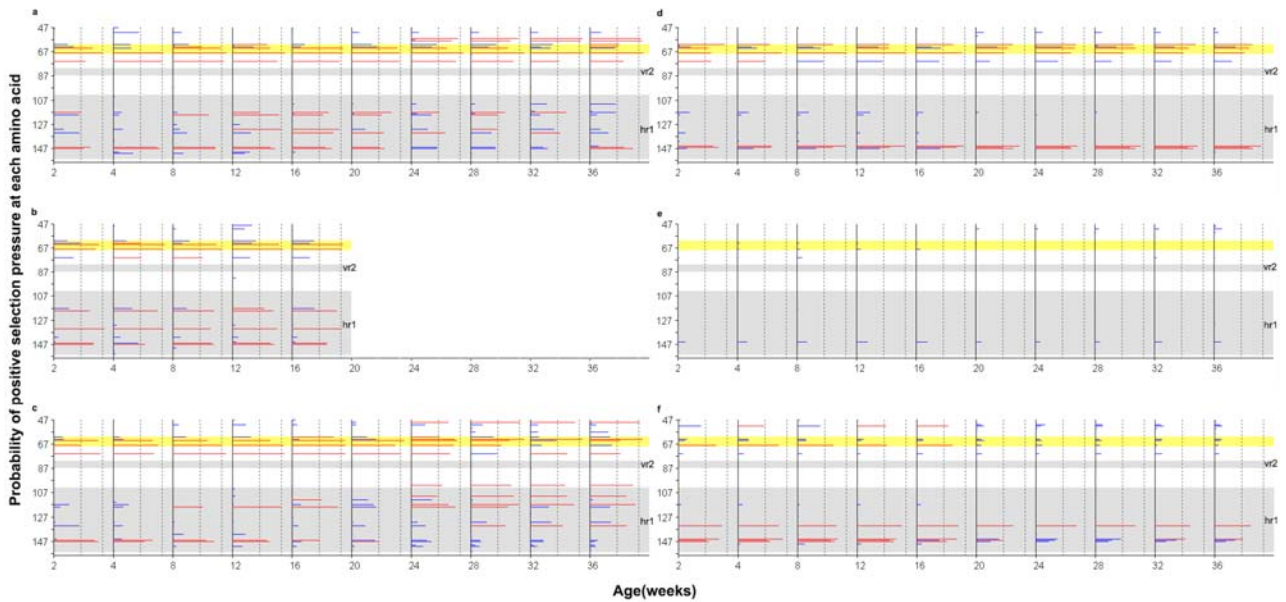

**Fig S3. Site-by-site positive selection of the gp85-A gene based on the MEME method.**

(A, B and C) The site-by-site positive selection value by the MEME method in chickens 1-3, respectively. (D, E and F) The site-by-site positive selection value by the MEME method in chickens 4-6, respectively. The x-axis of each panel represents different sampling time-points. The y-axis represents the amino acid positions of the gp85 protein. The horizontal lines in each panel represent the positively selected sites, and the length of the lines represents the proportion of the identified positively selected sites in the bootstrap re-sampling replicates. Red lines indicate that these amino acid sites are positively selected in at least 50% of the bootstrap re-sampling replicates, and blue lines indicate positive selection of less than 50%. The two vertical dashed lines represent the 50% and 90% thresholds. The two previously described hypervariable regions, vr2 and hr1, are shown using a grey background. Positions 61-68, a novel hypervariable region, are highlighted using a yellow background.

**Figure S4**

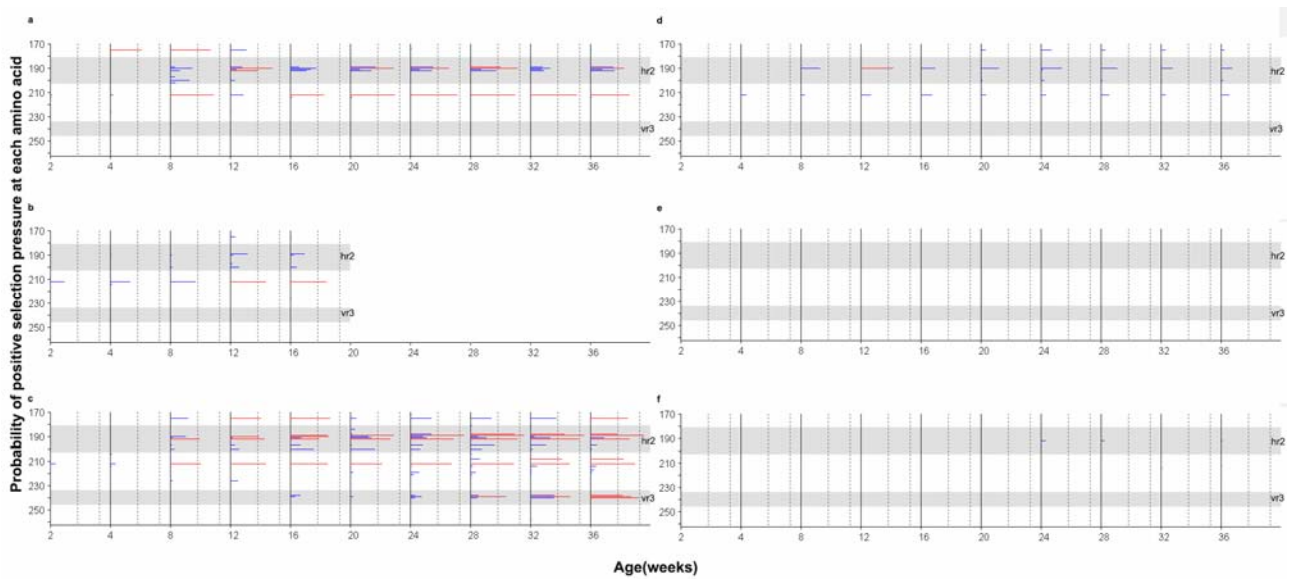

**Fig S4. Site-by-site positive selection of the gp85-B gene based on the two rate FEL method.**

(A, B and C) The site-by-site positive selection value by the two rate FEL method in chickens 1-3, respectively. (D, E and F) The site-by-site positive selection value by the two rate FEL method in chickens 4-6, respectively. The x-axis of each panel represents different sampling time-points. The y-axis represents the amino acid positions of the gp85 protein. The horizontal lines in each panel represent the positively selected sites, and the length of the lines represents the proportion of the identified positively selected sites in the bootstrap re-sampling replicates. Red lines indicate that these amino acid sites are positively selected in at least 50% of the bootstrap re-sampling replicates, and blue lines indicate positive selection of less than 50%. The two vertical dashed lines represent the 50% and 90% thresholds. The two previously described hypervariable regions, vr3 and hr2, are shown using a grey background.

**Figure S5**

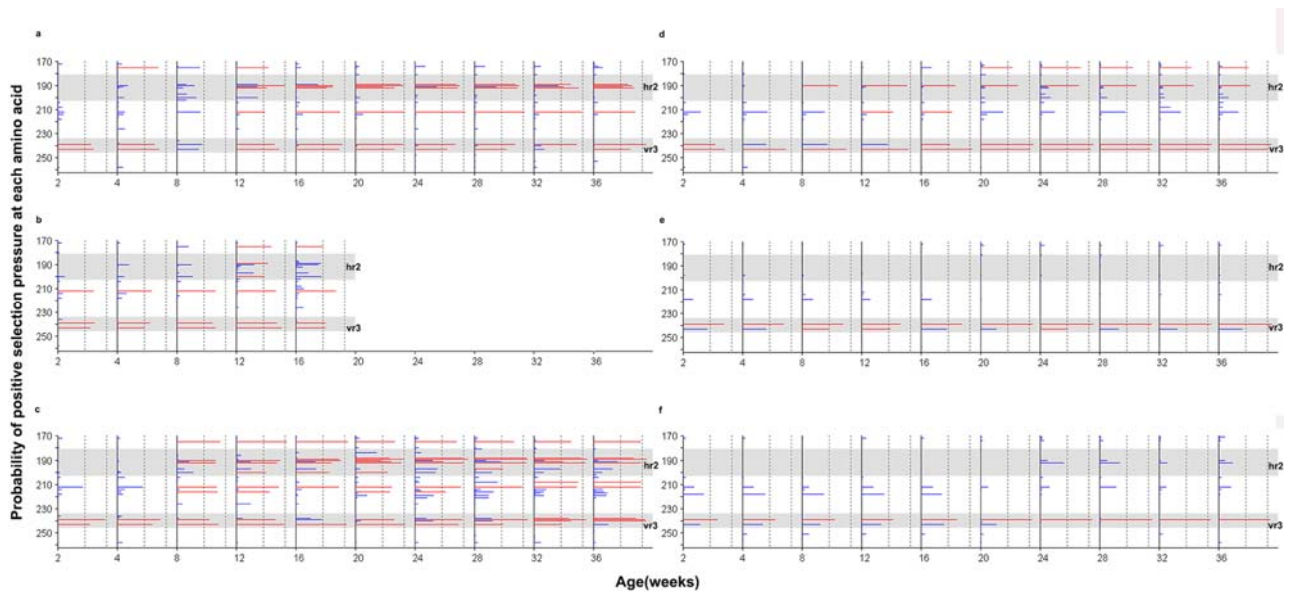

**Fig S5. Site-by-site positive selection of the gp85-B gene based on the MEME method.**

(A, B and C) The site-by-site positive selection value by the MEME method in chickens 1-3, respectively. (D, E and F) The site-by-site positive selection value by the MEME method in chickens 4-6, respectively. The x-axis of each panel represents different sampling time-points. The y-axis represents the amino acid positions of the gp85 protein. The horizontal lines in each panel represent the positively selected sites, and the length of the lines represents the proportion of the identified positively selected sites in the bootstrap re-sampling replicates. Red lines indicate that these amino acid sites are positively selected in at least 50% of the bootstrap re-sampling replicates, and blue lines indicate positive selection of less than 50%. The two vertical dashed lines represent the 50% and 90% thresholds. The two previously described hypervariable regions, vr3 and hr2, are shown using a grey background.

**Table S1. The re-sampling strategy used in the positive selection analysis.**

| Number                 | Number of replicates | Number of sequences of each replicate |
|------------------------|----------------------|---------------------------------------|
| $N \geq 50000$         | 750                  | 200                                   |
| $40000 \leq N < 50000$ | 600                  | 200                                   |
| $30000 \leq N < 40000$ | 450                  | 200                                   |
| $N < 30000$            | 300                  | 200                                   |

This table describes the re-sampling strategy used in the positive selection analysis. For example, if the number of clean reads in the dataset is no less than 50000, we performed 750 re-sampling replicates, with 200 sequences in each replicate. If the number of clean reads in the dataset is no less than 40000, but less than 50000, we performed 600 re-sampling replicates, with 200 sequences in each replicate. For each replicate, we performed the positive selection analysis and calculated the global  $\omega$  and the average  $\omega$  of all the replicates from a single dataset was estimated to represent the selection level for the dataset.



**Table S2. The number of raw reads and clean reads of each sample.**

| Number | Segment A |             |        |           |             | Segment B |           |             |        |           |             |
|--------|-----------|-------------|--------|-----------|-------------|-----------|-----------|-------------|--------|-----------|-------------|
|        | Raw reads | Clean reads | Number | Raw reads | Clean reads | Number    | Raw reads | Clean reads | Number | Raw reads | Clean reads |
| A102   | 46394     | 45268       | A402   | 57995     | 56422       | B102      | 44259     | 43187       | B402   | 28159     | 27387       |
| A104   | 38959     | 37592       | A404   | 44065     | 42501       | B104      | 44224     | 42644       | B404   | 50424     | 48580       |
| A108   | 52667     | 44317       | A408   | 21401     | 20943       | B108      | 24619     | 23873       | B408   | 34521     | 33585       |
| A112   | 34309     | 33615       | A412   | 7553      | 7415        | B112      | 48628     | 47374       | B412   | 50438     | 49300       |
| A116   | 16187     | 15747       | A416   | 22046     | 21669       | B116      | 43859     | 42668       | B416   | 29575     | 28988       |
| A120   | 37490     | 34644       | A420   | 28016     | 26945       | B120      | 17157     | 16701       | B420   | 7522      | 7324        |
| A124   | 32238     | 31183       | A424   | 47797     | 46394       | B124      | 17440     | 17082       | B424   | 31096     | 30372       |
| A128   | 32940     | 31689       | A428   | 29394     | 28571       | B128      | 12306     | 12038       | B428   | 19583     | 19211       |
| A132   | 46835     | 45086       | A432   | 24685     | 23910       | B132      | 11849     | 11481       | B432   | 10549     | 10311       |
| A136   | 25226     | 23308       | A436   | 41012     | 39680       | B136      | 7584      | 7342        | B436   | 17120     | 16648       |
| A202   | 42711     | 41637       | A502   | 15064     | 14773       | B202      | 40370     | 39302       | B502   | 18992     | 18653       |
| A204   | 10951     | 10614       | A504   | 44068     | 42924       | B204      | 36341     | 35139       | B504   | 47633     | 46368       |
| A208   | 36719     | 36073       | A508   | 14791     | 14477       | B208      | 37063     | 36232       | B508   | 31911     | 31267       |
| A212   | 3081      | 3028        | A512   | 38120     | 37549       | B212      | 48486     | 47389       | B512   | 48168     | 47391       |
| A216   | 33254     | 32604       | A516   | 38589     | 37993       | B216      | 41619     | 40651       | B516   | 38648     | 38006       |
|        |           |             | A520   | 48578     | 47284       |           |           |             | B520   | 13781     | 13486       |
|        |           |             | A524   | 43742     | 42877       |           |           |             | B524   | 11856     | 11662       |
|        |           |             | A528   | 24393     | 23891       |           |           |             | B528   | 8529      | 8388        |
|        |           |             | A532   | 43181     | 42147       |           |           |             | B532   | 14338     | 14069       |
|        |           |             | A536   | 23005     | 22173       |           |           |             | B536   | 12329     | 12073       |
| A302   | 44164     | 43092       | A602   | 37799     | 37055       | B302      | 52977     | 51698       | B602   | 41360     | 40420       |
| A304   | 20522     | 19921       | A604   | 29273     | 28781       | B304      | 33163     | 32031       | B604   | 34250     | 33629       |
| A308   | 42011     | 35350       | A608   | 16051     | 15781       | B308      | 45770     | 44615       | B608   | 18006     | 17671       |
| A312   | 41748     | 39956       | A612   | 35969     | 33077       | B312      | 41373     | 40410       | B612   | 35631     | 35038       |
| A316   | 10735     | 10534       | A616   | 19509     | 19213       | B316      | 10988     | 10767       | B616   | 20914     | 20545       |
| A320   | 20369     | 19422       | A620   | 26176     | 25427       | B320      | 9027      | 8755        | B620   | 6287      | 6150        |
| A324   | 22155     | 21222       | A624   | 21189     | 20686       | B324      | 7034      | 6794        | B624   | 12401     | 12162       |
| A328   | 22436     | 21525       | A628   | 45032     | 43819       | B328      | 5212      | 4991        | B628   | 9949      | 9772        |
| A332   | 15692     | 14936       | A632   | 41373     | 40109       | B332      | 12203     | 11617       | B632   | 25171     | 24629       |
| A336   | 34528     | 33016       | A636   | 36206     | 34758       | B336      | 12845     | 12264       | B636   | 13323     | 12893       |

In this table, the variants is named as follows. For example, A102 means region A of the gp85 gene (gp85-A), in which the first number “1” means chicken 1 and 02 represents that this sample is collected at week 2. Therefore, B424 represents the number of reads of gp85-B at week 24 of chicken 4.
